# Supplementary material for: Resorcinarene configuration and inclusion behaviour: Isolation of a guest free form of pyrogall[4]arene
Source: Royal Society of Chemistry journal article supplement (doi:10.1039/b603883b), 2006-01-01
Supplement: b603883b.pdf [file b603883b.pdf]

**Table S1** Cell constants for the *apo rctt* PGR host (compound **2**) and the PGR/DMF clathrate at room temperature (Compound **3**). Cells were indexed using the predicted patterns from SCXRD measurements as a guide, in conjunction with the Powder 4 Suite of programs.<sup>1</sup>

|                       | Compound <b>2</b> | Compound <b>3</b> |
|-----------------------|-------------------|-------------------|
| $a$ (Å)               | 8.894             | 10.201            |
| $b$ (Å)               | 9.355             | 11.670            |
| $c$ (Å)               | 9.469             | 11.648            |
| $\alpha$ (°)          | 106.71            | 81.44             |
| $\beta$ (°)           | 104.61            | 73.49             |
| $\gamma$ (°)          | 104.69            | 83.68             |
| $V$ (Å <sup>3</sup> ) | 683.52            | 1311.12           |

<sup>1</sup>N. Dragoë, *J. Appl. Cryst.*, 2001, **34**, 535.
